# Supplementary material
Source: PubMed Central journal article supplement (PMC7963833)
Supplement: 16-00588.pdf [file 16-00588.pdf]

## ON-LINE APPENDIX: DETAILS OF ANIMAL HOUSING, HUSBANDRY, AND ANESTHESIA

### Protocols

**Animal Housing and Husbandry.** The New Zealand white rabbits (Charles River Canada; Senneville, Quebec, Canada) were housed individually (R-SUITE Enriched Rabbit Housing; Tecniplast, West Chester, Pennsylvania). The housing room was ventilated with filtered 100% outside air (room temperature,  $19 \pm 1^\circ\text{C}$ ; relative humidity,  $50\% \pm 10\%$ ) and a 12:12 hour light/dark cycle. Animals received 225 mL of feed daily (Charles River Rabbit 5079-autoclavable; Charles River, Senneville, Quebec, Canada), with alfalfa, vegetables, and water provided ad libitum. Each cage was provided with cardboard boxes, dumbbell toys, and wood gnawing blocks (Bio-Serv, Flemington, New Jersey).

**Anesthesia.** On the day before the procedure, the dorsal aspect of the neck was shaved for the application of a 12- $\mu\text{m/h}$  fentanyl patch (Sandoz Canada, Boucherville, Quebec, Canada). On the day of the procedure, the rabbit received glycopyrrolate (0.01-mg/kg; Omega, Montreal, Quebec, Canada) and acepromazine (0.75-mg/kg, Atravet; Boehringer Ingelheim, Burlington, Ontario, Canada) subcutaneously as premedication. A 24-ga catheter (Jelco; Smiths Med-

ical, Southington, Connecticut) was introduced in the marginal ear vein, and general anesthesia was induced with an intravenous injection of propofol (5 mg/kg, Diprivan 1%; AstraZeneca, Mississauga, Ontario Canada). Endotracheal intubation was performed with a 3-mm (inner diameter) cuffed tracheal tube (Teleflex, Durham, North Carolina), and anesthesia was maintained with isoflurane (2%–3%, Forane; Baxter, Mississauga, Ontario, Canada) in oxygen (flow rate, 1 L/min). A second catheter was inserted in the saphenous vein for the administration of a constant rate infusion of ketamine (1.2-mg/kg/h, Vetalar; Bioniche Life Sciences, Belleville, Ontario, Canada) and lidocaine hydrochloride (1.5 mg/kg/h; Hospira, Montreal, Quebec, Canada). Meloxicam (0.3-mg/kg, Metacam; Boehringer Ingelheim, Burlington, Ontario, Canada) was administered subcutaneously 1 hour before the surgical procedure, and the surgical site was infiltrated with bupivacaine hydrochloride (2-mg/kg; Hospira). Postoperative anesthesia was maintained for 3 days with daily meloxicam by mouth (0.3 mg/kg), and subcutaneous buprenorphine (0.01-mg/kg, Vetergesic; Health care Ltd, Hull, United Kingdom) was used as rescue anesthesia. The fentanyl patch was removed 72 hours after application. A light bandage and a pillow collar (Lomir Biomedical Inc, Notre-Dame-de l'île-Perrot, Quebec, Canada) were placed on the surgical wound for 6 days.

**On-line Table: Aneurysms and angiographic results**

|                        | Aneurysm Dimensions |               |                           |                  |                       |                           | Treatment | Angiographic Score |
|------------------------|---------------------|---------------|---------------------------|------------------|-----------------------|---------------------------|-----------|--------------------|
|                        | Saccular Portion    |               |                           | Fusiform Portion |                       |                           |           |                    |
|                        | Length (mm)         | Width (mm)    | Volume (mm <sup>3</sup> ) | Length (mm)      | Maximum Diameter (mm) | Volume (mm <sup>3</sup> ) |           |                    |
| Complex fusiform model |                     |               |                           |                  |                       |                           |           |                    |
| 1                      | 10.3                | 4.1           | 90.7                      | 6.0              | 5.7                   | 102.1                     | HPS       | 0                  |
| 2                      | 8.5                 | 3.9           | 67.7                      | 7.8              | 4.8                   | 94.1                      | HPS       | 0                  |
| 3                      | 8.5                 | 4.4           | 86.2                      | 7.7              | 5.2                   | 109                       | HPS       | 0                  |
| 4                      | 9.6                 | 4.2           | 88.7                      | 6.1              | 4.7                   | 70.6                      | 2xHPS     | 2                  |
| 5                      | 6.9                 | 4.0           | 57.8                      | 7.7              | 5.2                   | 109                       | 2xHPS     | 0                  |
| 6                      | 12.3                | 3.7           | 88.2                      | 7.8              | 5                     | 102.1                     | FD        | 3                  |
| 7                      | 9.1                 | 3.7           | 65.2                      | 7.6              | 4.3                   | 73.6                      | FD        | 4                  |
| 8                      | 8.0                 | 3.0           | 37.7                      | 8.6              | 4.2                   | 79.4                      | FD        | 3                  |
| 9 <sup>a</sup>         | 6.9                 | 4.1           | 60.7                      | 16.5             | 8.6                   | 639                       | FD        | 4                  |
| 10                     | 11.2                | 4             | 93.8                      | 7.8              | 4.4                   | 79.1                      | Control   | 0                  |
| 11                     | 9.6                 | 4.2           | 88.7                      | 6.1              | 4.7                   | 70.6                      | Control   | 0                  |
| 12                     | 9.9                 | 3.7           | 71                        | 7.4              | 4                     | 62                        | Control   | 0                  |
| 13 <sup>b</sup>        | —                   | —             | —                         | —                | —                     | —                         | —         | —                  |
| 14 <sup>b</sup>        | —                   | —             | —                         | —                | —                     | —                         | —         | —                  |
| Mean                   | 9.2 $\pm$ 1.6       | 3.9 $\pm$ 0.4 | 74.7 $\pm$ 17.4           | 8.1 $\pm$ 2.8    | 5.1 $\pm$ 1.2         | 132.6 $\pm$ 160.3         |           |                    |
| Saccular model         |                     |               |                           |                  |                       |                           |           |                    |
| 15                     | 7.8                 | 3.1           | 39.2                      | —                | —                     | —                         | HPS       | 1                  |
| 16                     | 8.0                 | 3.2           | 42.9                      | —                | —                     | —                         | HPS       | 0                  |
| 17                     | 6.6                 | 3.6           | 44.8                      | —                | —                     | —                         | HPS       | 4                  |
| 18                     | 8.9                 | 2.6           | 31.5                      | —                | —                     | —                         | 2xHPS     | 3                  |
| 19                     | 7.4                 | 3.1           | 37.2                      | —                | —                     | —                         | 2xHPS     | 4                  |
| 20                     | 8.2                 | 3.7           | 58.8                      | —                | —                     | —                         | 2xHPS     | 3                  |
| 21                     | 8.2                 | 3.3           | 46.8                      | —                | —                     | —                         | FD        | 4                  |
| 22                     | 9.5                 | 3.4           | 57.5                      | —                | —                     | —                         | FD        | 4                  |
| 23                     | 7.4                 | 2.9           | 32.6                      | —                | —                     | —                         | FD        | 4                  |
| 24                     | 8.4                 | 4.0           | 70.4                      | —                | —                     | —                         | FD        | 3                  |
| 25                     | 9.3                 | 3.8           | 70.3                      | —                | —                     | —                         | Control   | 0                  |
| 26                     | 6.8                 | 3.4           | 41.2                      | —                | —                     | —                         | Control   | 0                  |
| 27                     | 4.6                 | 2.0           | 9.6                       | —                | —                     | —                         | Control   | 0                  |
| 28 <sup>b</sup>        | —                   | —             | —                         | —                | —                     | —                         | —         | —                  |
| Mean                   | 7.8 $\pm$ 1.3       | 3.2 $\pm$ 0.5 | 44.8 $\pm$ 16.7           | —                | —                     | —                         |           |                    |

**Note:**—2xHPS indicates double HPSs.

<sup>a</sup>Required 2 telescoping FDs for treatment.

<sup>b</sup>The parent vessel was occluded on preimplantation angiography (no aneurysm visible).
